# Supplementary material for: Unoccupied 3d orbitals make Li-unalloyable transition metals usable as anode materials for lithium ion batteries
Source: Royal Society of Chemistry journal article supplement (doi:10.1039/d1ta02623b), 2021-01-01
Supplement: d1ta02623b1.pdf [file d1ta02623b1.pdf]

## Supporting Information

### Unoccupied 3d orbitals makes Li-unalloyable transition metals usable as anode materials for lithium ion batteries

Liping Guo,<sup>a</sup> Zhongqing Jiang<sup>b</sup> and Zhong-Jie Jiang<sup>\*c</sup>

<sup>a</sup> Guangzhou Key Laboratory for Surface Chemistry of Energy Materials, New Energy Research Institute, College of Environment and Energy, South China University of Technology, Guangzhou 510006, P. R. China. Email: [eszjiang@scut.edu.cn](mailto:eszjiang@scut.edu.cn) and [zhongjiejiang1978@hotmail.com](mailto:zhongjiejiang1978@hotmail.com)

<sup>b</sup> Key Laboratory of Optical Field Manipulation of Zhejiang Province, Department of Physics, Zhejiang Sci-Tech University, Hangzhou 310018, P. R. China.

<sup>c</sup> Guangdong Engineering and Technology Research Center for Surface Chemistry of Energy Materials, College of Environment and Energy, South China University of Technology, Guangzhou 510006, P. R. China.

This PDF file includes:

**Figures. S1 to S10**

**Tables S1-S2**

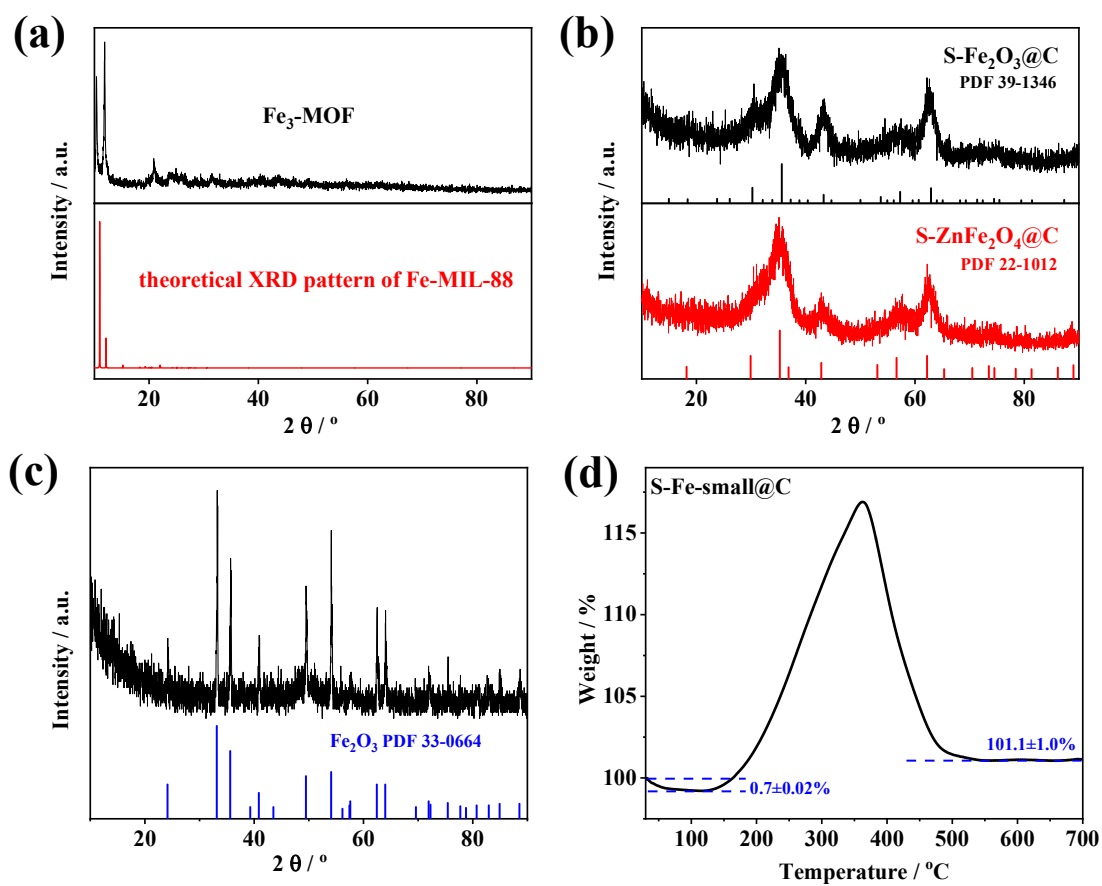

**Figure S1.** (a) XRD pattern of the Fe<sub>3</sub>-MOF and standard XRD pattern of Fe-MIL-88. (b) XRD pattern of S-Fe<sub>2</sub>O<sub>3</sub>@C and S-ZnFe<sub>2</sub>O<sub>4</sub>@C. (c) XRD pattern of S-Fe@C after TG. (d) TG curve of the S-Fe-small@C.

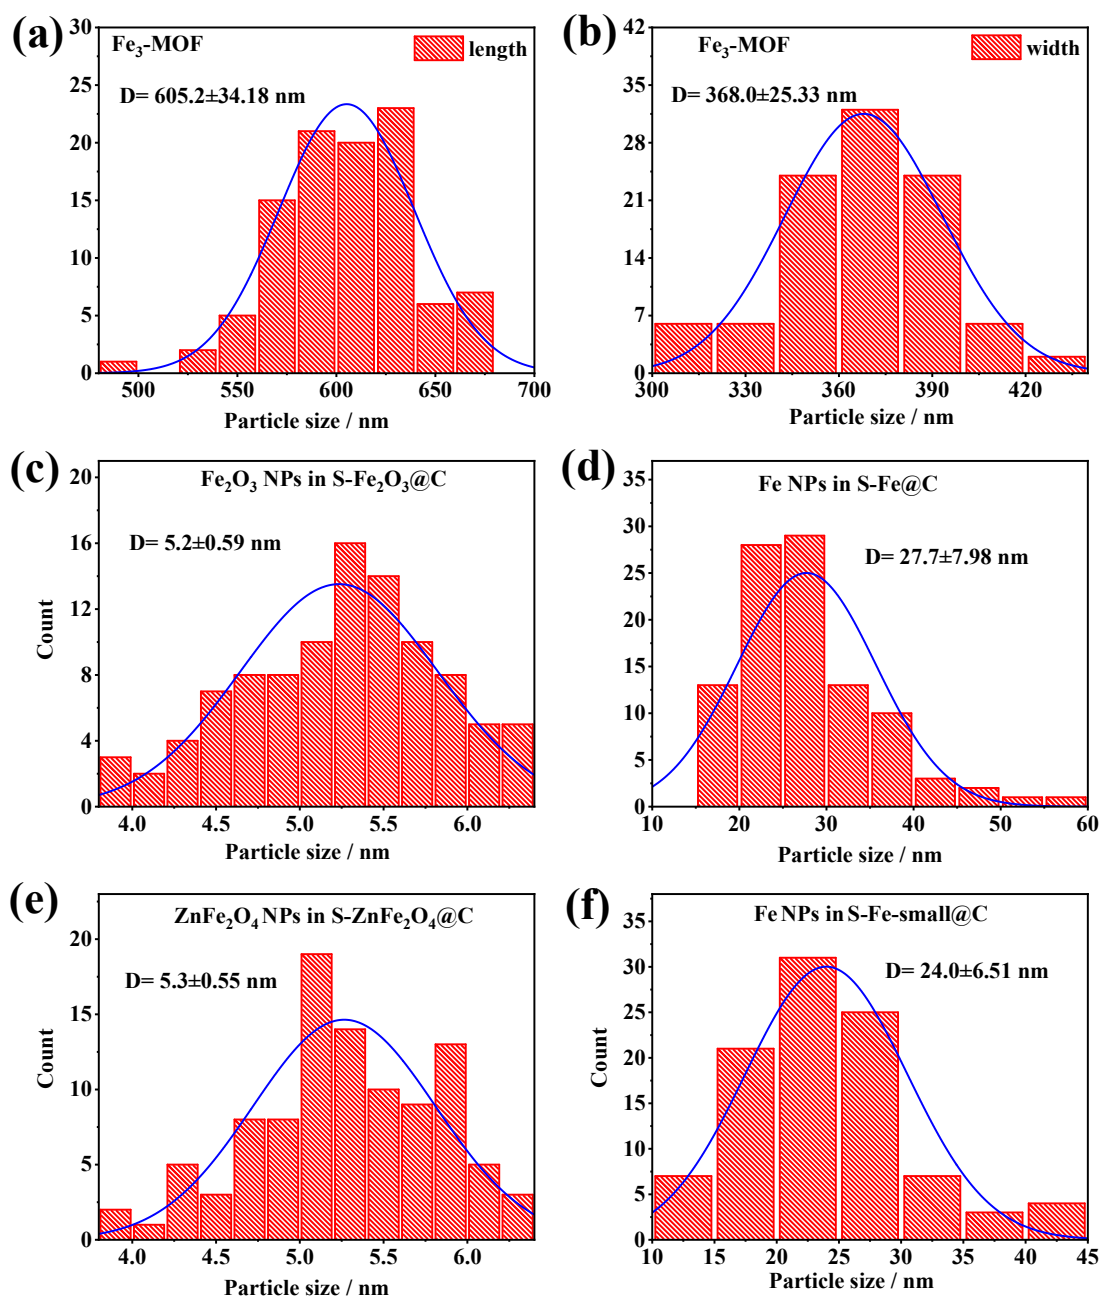

**Figure S2.** Particle size distribution of (a) and (b)  $\text{Fe}_3\text{-MOF}$ , (c)  $\text{Fe}_2\text{O}_3$  NPs in the  $\text{S-Fe}_2\text{O}_3\text{@C}$ , (d) Fe NPs in the  $\text{S-Fe@C}$ , (e)  $\text{ZnFe}_2\text{O}_4$  NPs in the  $\text{S-ZnFe}_2\text{O}_4\text{@C}$  and (f) Fe NPs in  $\text{S-Fe-small@C}$ .

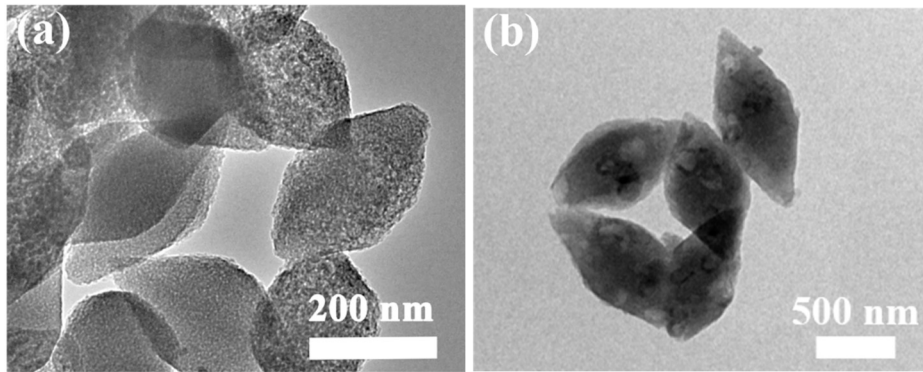

**Figure S3.** TEM images of (a) the porous carbon obtained by the removal of the  $\text{Fe}_2\text{O}_3$  nanoparticles from the  $\text{S-Fe}_2\text{O}_3@\text{C}$ , and (b) the S-carbon synthesized by the removal of Fe from the  $\text{S-Fe}@\text{C}$  through the HCl etching.

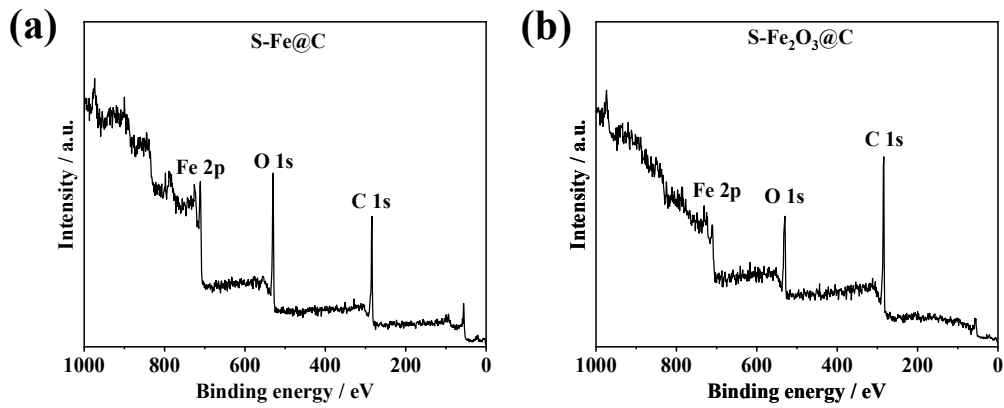

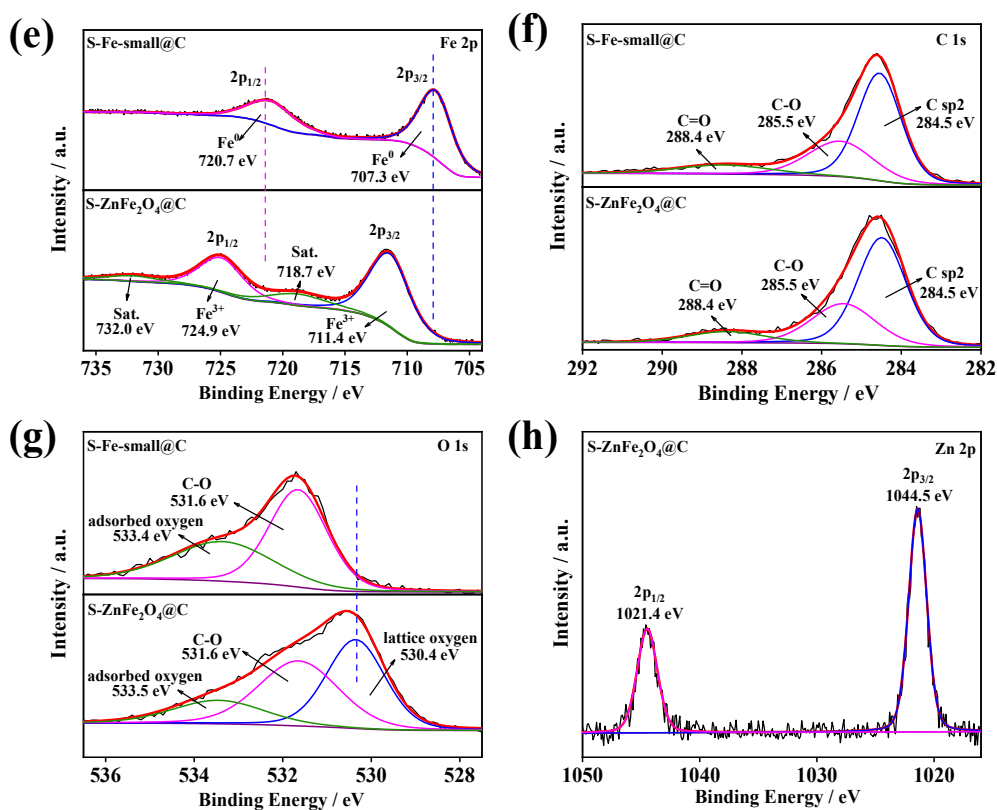

**Figure S4.** XPS survey spectra of (a) S-Fe@C, (b) S-Fe<sub>2</sub>O<sub>3</sub>@C, (c) S-ZnFe<sub>2</sub>O<sub>4</sub>@C and (d) S-Fe-small@C. High-resolution XPS spectra of (e) Fe 2p, (f) C 1s, and (g) O 1s for S-ZnFe<sub>2</sub>O<sub>4</sub>@C and S-Fe-small@C. (h) High-resolution XPS spectra of Zn 2p for S-ZnFe<sub>2</sub>O<sub>4</sub>@C.

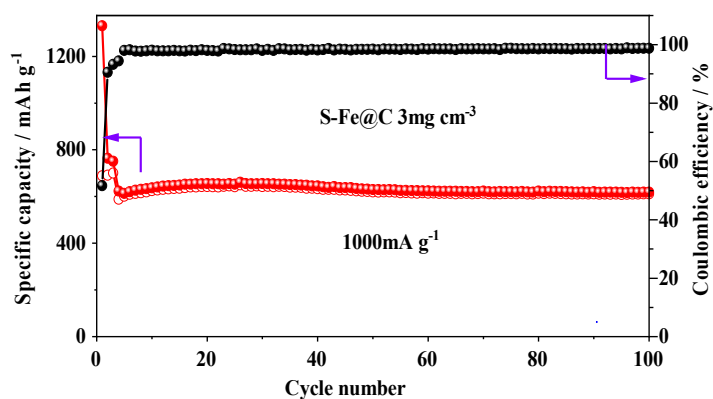

**Figure S5.** Cycling performance and coulombic efficiencies of S-Fe@C with a mass loading  $\sim 3.0 \text{ mg cm}^{-2}$  at  $1.0 \text{ A g}^{-1}$ .

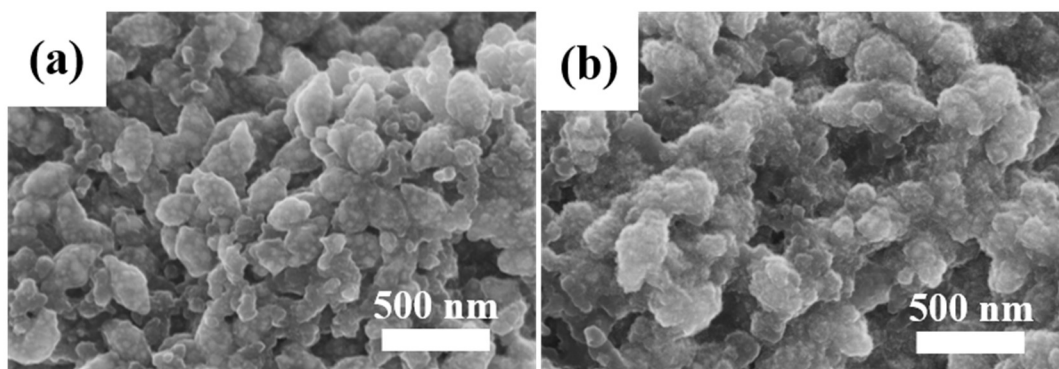

**Figure S6.** SEM image of S-Fe@C in the presence of carbon black and PVDF binders before and after 50 cycles at 1.0 A g<sup>-1</sup>. The presence of carbon black and PVDF binders makes the profile of the particles less distinct.

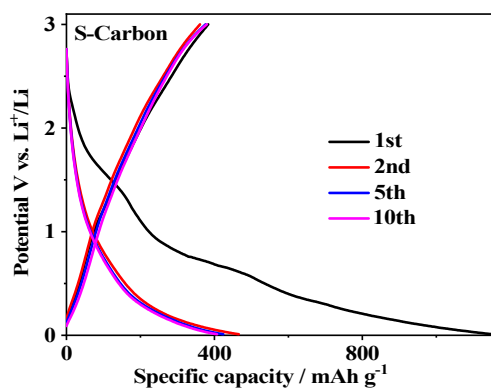

**Figure S7.** Charge/discharge voltage profiles of S-carbon at 100 mA g<sup>-1</sup>.

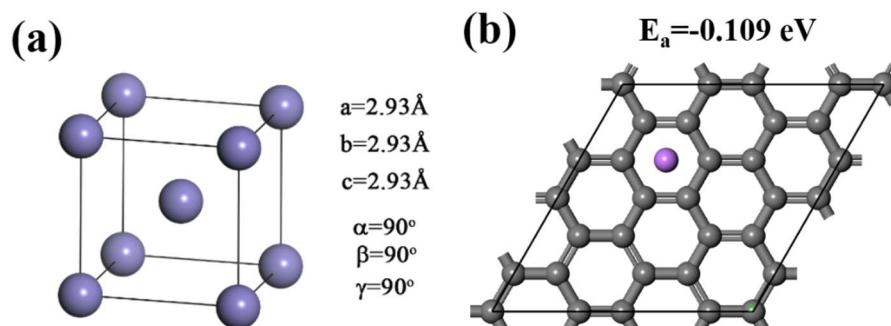

**Figure S8.** (a) Lattice constants of the cubic structure Fe. (b) Adsorption of the Li atom on a single layer graphene.

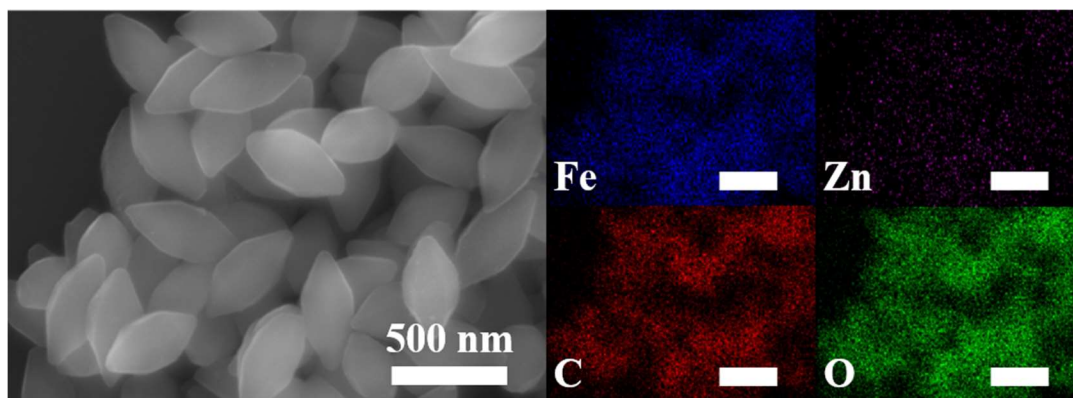

**Figure S9.** Elemental mapping images of S-ZnFe<sub>2</sub>O<sub>4</sub>@C.

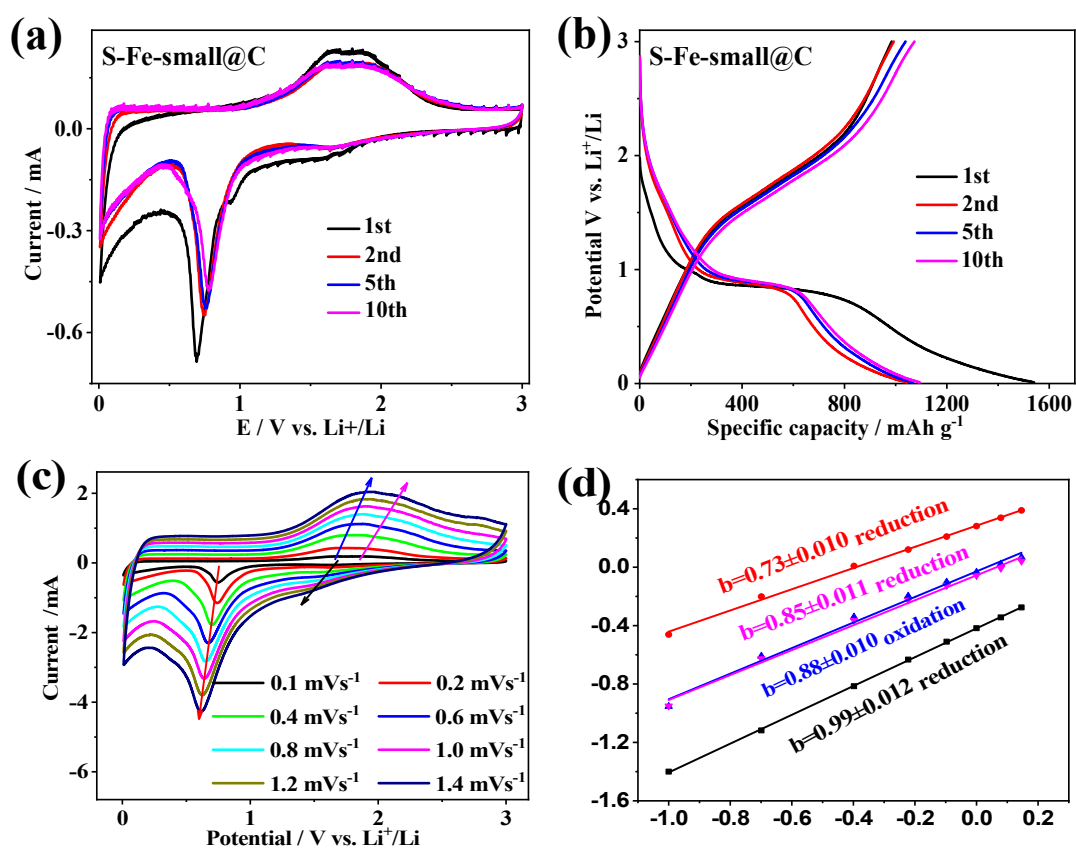

**Figure S10.** (a) CVs of S-Fe-small@C at 0.1 mV s<sup>-1</sup>. (b) Charge/discharge voltage profiles of (b) S-Fe-small@C. (c) CVs of S-Fe-small@C at different scan rates. (d) b-value of S-Fe-small@C.

**Table S1.** Stable reversible capacity comparison of the S-Fe@C and S-Fe-small@C with other anode materials for LIBs.

| Electrode material                                                            | Mass loading<br>mg cm <sup>-2</sup> | Current density<br>(mA g <sup>-1</sup> ) | Cycles | Capacity<br>(mAh g <sup>-1</sup> ) | Reference |
|-------------------------------------------------------------------------------|-------------------------------------|------------------------------------------|--------|------------------------------------|-----------|
| S-Fe@C                                                                        | ~1.0                                | 100                                      | 100    | 967.3±16.2                         | This work |
|                                                                               |                                     | 1000                                     | 1000   | 700.4±10.5                         |           |
| S-Fe-small@C                                                                  | ~3.0                                | 1000                                     | 100    | 611.0±10.5                         | This work |
|                                                                               |                                     | 100                                      | 100    | 1091.9±17.6                        |           |
| Sb@C                                                                          | ~1.0                                | 1000                                     | 1000   | 925.1±13.7                         | 1         |
| Sn@aCT                                                                        |                                     | 100                                      | 350    | 870                                |           |
| TiO <sub>2</sub> -Sn@CNFs                                                     | 1.5                                 | 200                                      | 1100   | 643                                | 2         |
| Sn-Sb micro/nano-structures                                                   | 1.0                                 | 100                                      | 100    | 751                                | 3         |
| Sb/Sb <sub>2</sub> O <sub>3</sub> /CNT/GNR                                    | 0.9-1.1                             | 50                                       | 100    | 619                                | 4         |
| SnSe/SnO <sub>x</sub> @CNFs                                                   | 1.73                                | 200                                      | 70     | 740.7                              | 5         |
| Sb <sub>2</sub> Se <sub>3</sub>                                               | 1.1                                 | 1000                                     | 1000   | 260.8                              | 6         |
| SnSe <sub>0.5</sub> S <sub>0.5</sub> /C                                       | 1.0                                 | 200                                      | 150    | 785                                | 7         |
| Bi <sub>2</sub> S <sub>3</sub> @C NW                                          | 1.0-1.5                             | 1000                                     | 700    | 501                                | 8         |
| Bi <sub>2</sub> S <sub>3</sub> @Co <sub>9</sub> S <sub>8</sub>                | 0.9-1.2                             | 100                                      | 100    | 798                                | 9         |
| Fe-MIL-88 B                                                                   | 1                                   | 60                                       | 400    | 744.5                              | 10        |
| Fe-BTC                                                                        | 2                                   | 1000                                     | 400    | 408.8                              | 11        |
| MIL-53(Fe)<br>@RGO                                                            | 0.75                                | 100                                      | 100    | 550                                | 12        |
| Mg-MOF-74/Cu                                                                  | 1.0-1.5                             | 500                                      | 300    | 531.7                              | 13        |
| Fe <sub>2</sub> O <sub>3</sub> @PAN                                           | 0.6-0.8                             | 1000                                     | 500    | 506.6                              | 14        |
| Fe <sub>3</sub> O <sub>4</sub> /C@VO <sub>x</sub>                             | 1.2                                 | 1000                                     | 500    | 845                                | 15        |
| C@Fe <sub>3</sub> C/Fe                                                        | 1.5                                 | 2000                                     | 1000   | 392                                | 16        |
| Fe <sub>3</sub> N@C                                                           | 0.6-1.2                             | 100                                      | 500    | 358                                | 17        |
| Ge <sub>3</sub> N <sub>4</sub> @C                                             | 3.5                                 | 550                                      | 200    | 702                                | 18        |
| N-Ti <sub>3</sub> C <sub>2</sub> /Fe <sub>2</sub> O <sub>3</sub>              | 1.5                                 | 2000                                     | 400    | 549                                | 19        |
| Co <sub>3</sub> O <sub>4</sub> @Co <sub>3</sub> V <sub>2</sub> O <sub>8</sub> | 0.8                                 | 100                                      | 100    | 948                                | 20        |
| ZnMn <sub>2</sub> O <sub>4</sub>                                              | 1.0                                 | 200                                      | 100    | 867                                | 21        |
| Zn <sub>2</sub> SiO <sub>4</sub> @NC                                          | 2.0                                 | 1000                                     | 400    | 540                                | 22        |
| NiS <sub>x</sub> @C                                                           | 1.0                                 | 1000                                     | 2000   | 460                                | 23        |
| CoS <sub>2</sub> /CNTs/graphene                                               | 2.0                                 | 100                                      | 100    | 368.2                              | 24        |
| NHMCFs/MoSe <sub>2</sub>                                                      |                                     | 1000                                     | 400    | 582.5                              | 25        |
| ZnS/NC                                                                        | 1.5-2.0                             | 200                                      | 100    | 757                                | 26        |
| Ni <sub>2</sub> P/Ni                                                          | 1.5                                 | 1000                                     | 1000   | 597                                | 27        |
| Ni <sub>2</sub> Pp⊂GN                                                         |                                     | 100                                      | 250    | 511                                | 28        |
| FeS <sub>2</sub> /Fe <sub>7</sub> S <sub>8</sub> -rGO                         | 1.0                                 | 200                                      | 250    | 650                                | 29        |
| GeP <sub>3</sub> /C                                                           | 1.3                                 | 1000                                     | 1000   | 312                                | 30        |
| CoP@C                                                                         |                                     | 1000                                     | 800    | 500                                | 31        |
| MoS <sub>2</sub> /Mo <sub>2</sub> TiC <sub>2</sub> Tx                         |                                     | 100                                      | 100    | 509                                | 32        |
| (FeCoNiCrMn) <sub>3</sub> O <sub>4</sub>                                      | ~3.0                                | 500                                      | 300    | 402                                | 33        |
| Fe-BTC                                                                        | 2.0                                 | 1000                                     | 400    | 408.8                              | 34        |
| Zn <sub>2</sub> SiO <sub>4</sub> @NC                                          | 2.0                                 | 1000                                     | 400    | 540                                | 23        |
| CoS <sub>2</sub> /CNTs/graphene                                               | 2.0                                 | 100                                      | 100    | 368.2                              | 25        |
| VN nanosheet                                                                  | 2.0                                 | 100                                      | 100    | 520                                | 35        |



**Table S2.** Rate performance comparison of the S-Fe@C and S-Fe-small@C with other anode materials for LIBs.

| Electrode material                                                            | Mass loading mg cm <sup>-2</sup> | 0.1 A g <sup>-1</sup> | 0.2 A g <sup>-1</sup> | 0.5 A g <sup>-1</sup> | 1.0 A g <sup>-1</sup> | 2.0 A g <sup>-1</sup> | 5.0 A g <sup>-1</sup> | 10.0 A g <sup>-1</sup> | Reference |
|-------------------------------------------------------------------------------|----------------------------------|-----------------------|-----------------------|-----------------------|-----------------------|-----------------------|-----------------------|------------------------|-----------|
| S-Fe@C                                                                        | ~1.0                             | 851.0<br>±12.9        | 825.9<br>±12.5        | 809.0<br>±12.1        | 762.6<br>±11.4        | 666.8<br>±10.3        | 534.4<br>±8.3         | 410.1<br>±6.6          | This work |
| S-Fe-small@C                                                                  | ~1.0                             | 1092.9<br>±17.9       | 1046.2<br>±16.5       | 971.9<br>±16.1        | 900.2<br>±14.3        | 815.7<br>±12.2        | 659.5<br>±9.8         | 490.6<br>±7.7          | This work |
| Sb@C                                                                          |                                  | 623                   | 558                   | 496                   | 439                   | 385                   |                       |                        | 1         |
| TiO <sub>2</sub> -Sn@CNFs                                                     |                                  |                       | 570                   |                       | 280                   |                       |                       |                        | 3         |
| Sn-Sb micro/nano structures                                                   | 1.0                              | 798.8                 | 717.8                 | 636.5                 | 545.5                 | 455.0                 |                       |                        | 4         |
| Sb/Sb <sub>2</sub> O <sub>3</sub> /CNT/GNR                                    | 0.9-1.1                          | 642                   | 514                   | 428                   | 369                   | 327                   |                       |                        | 5         |
| SnO <sub>2</sub> @SnS <sub>2</sub> @NG                                        |                                  | 898                   | 820                   | 715                   | 612                   | 497                   | 343                   |                        | 36        |
| SnSe/SnOx@CNFs                                                                | 1.73                             | 803                   | 709                   | 579                   | 391                   | 301                   |                       |                        | 6         |
| Sb <sub>2</sub> Se <sub>3</sub>                                               | 1.1                              | 638.2                 | 611.5                 | 543.6                 | 472.3                 | 389.5                 |                       |                        | 7         |
| SnSe <sub>0.5</sub> S <sub>0.5</sub> /C                                       | 1.0                              | 989                   | 830                   | 729                   | 646                   | 553                   | 389                   |                        | 8         |
| Bi <sub>2</sub> S <sub>3</sub> @Co <sub>9</sub> S <sub>8</sub>                | 0.9-1.2                          | 785                   | 672                   | 612                   | 573                   | 512                   |                       |                        | 10        |
| MoS <sub>2</sub> @SnS-QDs/CNN                                                 | 1.0-1.2                          | 1130                  | 1078                  | 947                   | 765                   | 591                   |                       |                        | 37        |
| C@Fe <sub>3</sub> C/Fe                                                        | 1.5                              | 1177                  | 1012                  | 954                   | 845                   | 682                   | 521                   |                        | 17        |
| Co <sub>3</sub> O <sub>4</sub> @Co <sub>3</sub> V <sub>2</sub> O <sub>8</sub> | 0.8                              | 1068                  | 916                   | 782                   | 678                   | 578                   | 550                   |                        | 21        |
| PCN-600(iron porphyrin-based MOF)                                             | 0.5                              |                       |                       |                       | 625                   | 470                   |                       |                        | 38        |
| Fe-MIL-88 B                                                                   | 1                                | 692.0                 | 582.6                 | 350.4                 | 232.7                 | 143.5                 | 133.4                 |                        | 11        |
| Fe-BTC                                                                        | 2                                | 873.8<br>/915.7       | 990.1<br>/996.3       |                       | 523.2<br>/525.0       | 302.8<br>/304.8       |                       |                        | 12        |
| MIL-53(Fe)@RGO                                                                | 0.75                             | 510                   |                       | 400                   | 360                   | 300                   |                       |                        | 13        |
| Mg-MOF-74/Cu                                                                  | 1.0-1.5                          | 796.2                 |                       | 560.5                 | 372.6                 | 259.1                 |                       |                        | 14        |
| NiO@N-C                                                                       |                                  | 1065                  | 1031                  |                       | 689                   | 634                   |                       |                        | 39        |
| Fe <sub>3</sub> O <sub>4</sub> /C@VO <sub>x</sub>                             | 1.2                              |                       | 810                   | 718                   | 605                   | 483                   | 340                   |                        | 16        |
| Fe <sub>2</sub> N@C                                                           | 1.4-2.1                          | 567                   | 526                   | 500                   | 474                   | 450                   | 404                   | 356                    | 40        |
| Fe <sub>3</sub> O <sub>4</sub> nanoparticle                                   |                                  | 1084                  | 883                   | 809                   | 648                   | 545                   | 410                   |                        | 41        |
| ZnMn <sub>2</sub> O <sub>4</sub>                                              | 1.0                              | 857                   | 784                   | 636                   | 481                   | 355                   | 94                    | 36                     | 22        |
| Zn <sub>2</sub> SiO <sub>4</sub> @NC                                          | 2.0                              | 640                   | 620                   | 560                   | 450                   | 370                   | 280                   |                        | 23        |
| NiS <sub>x</sub> @C                                                           | 1.0                              | 790                   | 720                   | 605                   | 540                   | 446                   | 350                   | 280                    | 24        |
| CoS <sub>2</sub> /CNTs/graphene                                               | 2.0                              |                       | 381                   |                       |                       | 251                   | 212                   |                        | 25        |
| NHMCFs/MoSe <sub>2</sub>                                                      |                                  | 666.4                 | 635.3                 | 352.9                 |                       |                       |                       | 244.3                  | 26        |
| ZnS/NC                                                                        | 1.5-2.0                          | 771                   | 725                   |                       | 600                   | 511                   |                       |                        | 27        |
| MoS <sub>2</sub> /Mo <sub>2</sub> TiC <sub>2</sub> Tx                         |                                  | 523                   | 484                   | 407                   | 315                   | 182                   |                       |                        | 33        |
| NiCoPS <sub>3</sub> /NC                                                       | 0.9-1.2                          | 976                   | 781                   | 723                   | 665                   | 625                   | 570                   |                        | 42        |
| Ni <sub>2</sub> P/Ni                                                          | 1.5                              | 611                   | 583                   | 521                   | 483                   | 449                   |                       |                        | 28        |
| Ni <sub>2</sub> Pp@GN                                                         |                                  | 520                   | 449                   | 397                   | 291                   | 283                   | 246                   |                        | 29        |
| CoP@C                                                                         |                                  | 770                   | 690                   | 560                   | 490                   | 420                   | 340                   |                        | 32        |

## References

1. J. Liu, L. Yu, C. Wu, Y. Wen, K. Yin, F.-K. Chiang, R. Hu, J. Liu, L. Sun, L. Gu, J. Maier, Y. Yu and M. Zhu, *Nano Lett.*, 2017, **17**, 2034-2042.
2. R. Zhuo, W. Quan, X. Huang, Q. He, Z. Sun, Z. Zhang and J. Wang, *Nanotechnology*, 2021, **32**, 145402.
3. M. Mao, F. Yan, C. Cui, J. Ma, M. Zhang, T. Wang and C. Wang, *Nano Lett.*, 2017, **17**, 3830-3836.
4. Z. Yi, Q. Han, D. Geng, Y. Wu, Y. Cheng and L. Wang, *J. Power Sources*, 2017, **342**, 861-871.
5. O. Jaramillo-Quintero, M. Benítez-Cruz, J. García-Ocampo, A. Cano and M. E. Rincón, *J. Alloy. Compd.*, 2019, **807**, 151647.
6. H. Yuan, Y. Jin, J. Lan, Y. Liu, Y. Yu and X. Yang, *Inorg. Chem. Front.*, 2018, **5**, 932-938.
7. A. N. Luo, J.-J. Gaumet, P. Magri, S. Diliberto, F. Li, P. Franchetti, J. Ghanbaja and L. Mai, *J. Energy Chem.*, 2019, **30**, 27-33.
8. Q. Tang, Y. Cui, J. Wu, D. Qu, A. P. Baker, Y. Ma, X. Song and Y. Liu, *Nano Energy*, 2017, **41**, 377-386.
9. L. Zhao, H.-H. Wu, C. Yang, Q. Zhang, G. Zhong, Z. Zheng, H. Chen, J. Wang, K. He, B. Wang, T. Zhu, X. C. Zeng, M. Liu and M.-S. Wang, *ACS Nano*, 2018, **12**, 12597-12611.
10. Y. Huang, X. Hu, J. Li, J. Zhang, D. Cai, B. Sa, H. Zhan and Z. Wen, *Energy Storage Mater.*, 2020, **29**, 121-130.
11. L. Shen, H. Song and C. Wang, *Electrochim. Acta*, 2017, **235**, 595-603.
12. X. Hu, X. Lou, C. Li, Y. Ning, Y. Liao, Q. Chen, E. S. Mananga, M. Shen and B. Hu, *Rsc Adv.*, 2016, **6**, 114483-114490.
13. C. Zhang, W. Hu, H. Jiang, J.-K. Chang, M. Zheng, Q.-H. Wu and Q. Dong, *Electrochim. Acta*, 2017, **246**, 528-535.

14. X. Li, C. He, J. Zheng, D. Wu, Y. Duan, Y. Li, P. Rao, B. Tang and Y. Rui, *ACS Appl. Mater. Interfaces*, 2020, **12**, 52864-52872.
15. Z. Li, X. Hu, Z. Shi, J. Lu and Z. Wang, *Appl. Surf. Sci.*, 2020, **531**, 147290.
16. B. Cong, Y. Hu, S. Sun, Y. Wang, B. Wang, H. Kong and G. Chen, *Nanoscale*, 2020, **12**, 16901-16909.
17. D. Chen, C. Feng, Y. Han, B. Yu, W. Chen, Z. Zhou, N. Chen, J. B. Goodenough and W. He, *Energy Environ. Sci.*, 2020, **13**, 2924-2937.
18. H. Huang, S. Gao, A.-M. Wu, K. Cheng, X.-N. Li, X.-X. Gao, J.-J. Zhao, X.-L. Dong and G.-Z. Cao, *Nano Energy*, 2017, **31**, 74-83.
19. C. Kim, G. Hwang, J.-W. Jung, S.-H. Cho, J. Y. Cheong, S. Shin, S. Park and I.-D. Kim, *Adv. Funct. Mater.*, 2017, **27**, 1605975.
20. Z. Zhang, L. Weng, Q. Rao, S. Yang, J. Hu, J. Cai and Y. Min, *J. Power Sources*, 2019, **439**, 227107.
21. Y. Lu, L. Yu, M. Wu, Y. Wang and X. W. D. Lou, *Adv. Mater.*, 2018, **30**, 1702875.
22. Q. Tang, Y. Shi, Z. Ding, T. Wu, J. Wu, V. Mattick, Q. Yuan, H. Yu and K. Huang, *Electrochim. Acta*, 2020, **338**, 135853.
23. F. Liu, S. Liu, J. Meng, F. Xia, Z. Xiao, Z. Liu, Q. Li, J. Wu and L. Mai, *Nano Energy*, 2020, **73**, 104758.
24. Q. Li, L. Li, P. Wu, N. Xu, L. Wang, M. Li, A. Dai, K. Amine, L. Mai and J. Lu, *Adv. Energy Mater.*, 2019, **9**, 1901153.
25. C. Xu, Y. Jing, J. He, K. Zhou, Y. Chen, Q. Li, J. Lin and W. Zhang, *J. Alloys Compd.*, 2017, **708**, 1178-1183.
26. X. Ni, Z. Cui, H. Luo, H. Chen, C. Liu, Q. Wu and A. Ju, *Chem. Eng. J.*, 2021, **404**, 126249.
27. P. Wang, A. Yuan, Z. Wang, X. Shen, H. Chen and H. Zhou, *Nanoscale*, 2021, **13**, 1988-1996.
28. X. Liu, W. Li, X. Zhao, Y. Liu, C.-W. Nan and L.-Z. Fan, *Adv. Funct. Mater.*, 2019, **29**,

1901510.

29. C. Wu, P. Kopold, P. A. v. Aken, J. Maier and Y. Yu, *Adv. Mater.*, 2017, **29**, 1604015.
30. Q. Tang, Q. Jiang, T. Wu, T. Wu, Z. Ding, J. Wu, H. Yu and K. Huang, *ACS Appl. Mater. Interfaces*, 2020, **14**, 52888-52898.
31. W. Qi, H. Zhao, Y. Wu, H. Zeng, T. Tao, C. Chen, C. Kuang, S. Zhou and Y. Huang, *Sci. Rep.*, 2017, **7**, 43582.
32. Z. Liu, S. Yang, B. Sun, X. Chang, J. Zheng and X. Li, *Angew. Chem.*, 2018, **57**, 10187-10191.
33. C. Chen, X. Xie, B. Anasori, A. Sarycheva, T. Makaryan, M. Zhao, P. Urbankowski, L. Miao, J. Jiang and Y. Gogotsi, *Angew. Chem.*, 2018, **57**, 1846-1850.
34. D. Wang, S. Jiang, C. Duan, J. Mao, Y. Dong, K. Dong, Z. Wang, S. Luo, Y. Liu and X. Qi, *J. Alloy. Compd.*, 2020, **844**, 156158.
35. X. Peng, W. Li, L. Wang, L. Hu, W. Jin, A. Gao, X. Zhang, K. Huo and P. K. Chu, *Electrochim. Acta*, 2016, **214**, 201-207.
36. S. Huang, M. Wang, P. Jia, B. Wang, J. Zhang and Y. Zhao, *Energy Storage Mater.*, 2019, **20**, 225-233.
37. G. Ke, H. Chen, J. He, X. Wu, Y. Gao, Y. Li, H. Mi, Q. Zhang, C. He and X. Ren, *Chem. Eng. J.*, 2021, **403**, 126251.
38. L. Sun, J. Xie, Z. Chen, J. Wua and L. Li, *Dalton Trans.*, 2018, **47**, 9989-9993.
39. K. Chu, Z. Li, S. Xu, G. Yao, Y. Xu, P. Niu and F. Zheng, *J. Alloy. Compd.*, 2021, **854**, 157264.
40. Y. Dong, B. Wang, K. Zhao, Y. Yu, X. Wang, L. Mai and S. Jin, *Nano Lett.*, 2017, **17**, 5740-5746.
41. W. Han, X. Qi, J. Wu, Q. Li, M. Liu, Y. Xia, H. Du, B. Li and F. Kang, *Nano Res.*, 2017, **11**, 892-904.
42. Q. Gui, Y. Feng, B. Chen, F. Gu, L. Chen, S. Meng, M. Xu, M. Xia, C. Zhang and J. Yang,

*Adv. Energy Mater.*, 2021, **11**, 2003553.
